# Supplementary material for: Changes in cytokine responses to TB antigens ESAT-6, CFP-10 and TB 7.7 and inflammatory markers in peripheral blood during therapy
Source: PubMed Central journal article supplement (PMC5773481; doi:10.1038/s41598-018-19523-7), 2018-01-18
Supplement: 41598_2018_19523_MOESM1_ESM.pdf [file 41598_2018_19523_MOESM1_ESM.pdf]

**Changes in cytokine responses to TB antigens ESAT-6, CFP-10 and TB 7.7 and inflammatory markers in peripheral blood during therapy**

Running title: inflammatory and cytokine markers in TB treatment

Ah Young Leem<sup>1\*</sup>, Joo Han Song<sup>1\*</sup>, Eun Hye Lee<sup>1</sup>, Hyejon Lee<sup>2</sup>, Bora Sim<sup>2</sup>, Song Yee Kim<sup>1</sup>,  
Kyung Soo Chung<sup>1</sup>, Eun Young Kim<sup>1</sup>, Ji Ye Jung<sup>1</sup>, Moo Suk Park<sup>1</sup>, Young Sam Kim<sup>1</sup>, Joon  
Chang<sup>1</sup>, Young Ae Kang<sup>1</sup>

<sup>1</sup>Division of Pulmonology, Department of Internal Medicine, Institute of Chest Disease,  
Severance Hospital, Yonsei University College of Medicine, 50-1 Yonsei-ro, Seodaemun-gu,  
Seoul 120-752, Republic of Korea

<sup>2</sup>Department of Microbiology and Institute of Immunology and Immunological Disease,  
Yonsei University College of Medicine, Seoul, Republic of Korea

\* These authors contributed equally to this work.

**Corresponding Author:** Young Ae Kang

Associate Professor

Division of Pulmonology, Department of Internal Medicine, Institute of Chest Disease,  
Severance Hospital, Yonsei University College of Medicine

50-1 Yonsei-ro, Seodaemun-gu, Seoul 120-752, Republic of Korea

Tel: 82-2-2228-1930, Fax: 82-2-393-6884, E-mail: MDKANG@yuhs.ac

**Supplementary Table 1.** The changes of levels of IFN- $\gamma$ , IL-10, IL-12, IL-13, IL-2 and TNF- $\alpha$  in supernatants of QFT-GIT before (T0), after 2 months (T2), and at the end of anti-TB treatment (Tend).

|    | IFN- $\gamma$ (TB-Nil) |         |         | IL-10 (TB-Nil) |        |        | IL-12 (TB-Nil) |        |        | IL-13 (TB-Nil) |        |        | IL-2 (TB-Nil) |        |        | TNF- $\alpha$ (TB-Nil) |         |         |
|----|------------------------|---------|---------|----------------|--------|--------|----------------|--------|--------|----------------|--------|--------|---------------|--------|--------|------------------------|---------|---------|
|    | T0                     | T2      | Tend    | T0             | T2     | Tend   | T0             | T2     | Tend   | T0             | T2     | Tend   | T0            | T2     | Tend   | T0                     | T2      | Tend    |
| 1  | 3306.37                | 1054.45 | 478.14  | -0.09          | -2.11  | -6.02  | 32.08          | 6.44   | -6.32  | 188.61         | 64.94  | 96.72  | 688.6         | 284.56 | 134.55 | 123.44                 | -27.4   | -677.14 |
| 2  | 84.24                  | 39.58   | 17.79   | 0.08           | -2.35  | -2.54  | 0              | 0      | 0      | 0              | -0.86  | 0      | 17.78         | 28.54  | 24.17  | 69.97                  | -490.05 | -101.46 |
| 3  | 462.37                 | 78.47   | 85.38   | 0.62           | -2.99  | -14.26 | 0              | 0      | 0      | 0              | 0      | 0      | 275.16        | 151.42 | 157.2  | -29.49                 | 304.07  | -283.15 |
| 4  | 427.7                  | 277.6   | 383.01  | 0.48           | -0.16  | -0.16  | 0              | 0      | 0      | 10.4           | 15.76  | 13.69  | 51.42         | 74.68  | 102.6  | -139.3                 | -25.33  | -110.92 |
| 5  | 1646.57                | 249.04  | 688.65  | -0.9           | -2.02  | -0.94  | -4.54          | 0      | 0      | 44.97          | 0      | 59.93  | 779.03        | 148.2  | 445.79 | 146.24                 | -32.11  | 118.41  |
| 6  | 465.39                 | 10.42   | 24.66   | 0.51           | -0.87  | -1.2   | -8.54          | 0      | 0      | 28.12          | 0      | 0      | 123.32        | 9.43   | 12.24  | -45.27                 | -177.59 | -277.3  |
| 7  | 336.56                 | 300.3   | 155.66  | 1.38           | -30.05 | -4.34  | 0              | -7.5   | 0      | 2.83           | 0      | 0      | 257.25        | 253.88 | 118.83 | 77.38                  | -458.95 | -78.84  |
| 8  | 732.14                 | 217.95  | 275     | 67.95          | 8.99   | 16.84  | 0              | 0      | 0      | 5.5            | 0      | 8.81   | 177.22        | 67.21  | 124    | 3089.97                | 388.72  | 447.52  |
| 9  | 500.11                 | 104.75  | 71.13   | 2.55           | 3.6    | -4.47  | 0              | 0      | 0      | 7.69           | 3.74   | 0.86   | 283.86        | 101.46 | 68.44  | -22.04                 | -82.29  | -91.39  |
| 10 | 1304.8                 | 586.65  | 186.73  | 0.68           | 2.18   | -5.17  | 0              | 0      | 0      | 58.2           | 3.74   | 0      | 197.24        | 148.61 | 58.39  | 91.56                  | 72.95   | 736.22  |
| 11 | 367.97                 | 197.76  | 188.54  | -0.32          | -2.03  | -3.03  | 0              | 0      | 0      | -1.88          | 2.83   | 0.86   | 43.69         | 51.14  | 49.02  | 14.86                  | 171.82  | -100.12 |
| 12 | 0                      | 595.23  | 581.75  | 0              | 0.09   | 0.08   | 0              | 0      | 0      | 0              | 18.9   | 30.02  | 0             | 244.82 | 238.02 | 0                      | 84.8    | -83.65  |
| 13 | 6064.24                | 2502.3  | 4065.9  | 1.78           | -2.23  | -67.68 | 0              | 0      | 2.01   | 118.68         | 47.57  | 151.75 | 591.6         | 553.12 | 431.97 | 96.57                  | 177.59  | -136.83 |
| 14 | 1965.1                 | 613.99  | 723.18  | 2.11           | -0.31  | -0.21  | 54.37          | 15.45  | 68.51  | 61.24          | 22.86  | 47.95  | 522.43        | 207.54 | 258.93 | 190.36                 | 127.24  | -102.16 |
| 15 | 1166.87                | 388.66  | 394.91  | -6.03          | -16.94 | 1.94   | 7.33           | -1.66  | 0.74   | 27.31          | 11.11  | 63.23  | 518.23        | 279.72 | 167.21 | 111.22                 | -827.79 | -170.42 |
| 16 | 172.51                 | 176.13  | 281.13  | -2.19          | -44.59 | -31.67 | -6.96          | -5.16  | 3.39   | 0.34           | 7.32   | 42.14  | 125.24        | 127.59 | 149.64 | -62.09                 | 20.91   | 15.08   |
| 17 | 3961.27                | 4259.38 | 1605.8  | -0.6           | -1.62  | -2.06  | -2.92          | 0      | 0      | 61.75          | 127.81 | 188.52 | 439.4         | 812.06 | 330.93 | 781.87                 | 145.11  | 1088.79 |
| 18 | 1225.77                | 854.7   | 471.85  | 3.34           | 4.09   | 2.96   | -0.41          | 0      | -1.63  | 143.9          | 21.57  | 26.91  | 499.5         | 431.32 | 194.01 | 640.63                 | -25.76  | 36.18   |
| 19 | 1576.52                | 334.4   | 1165.13 | -29.39         | -25.62 | -43.52 | 1.46           | 14.42  | 10.21  | 28.49          | 0      | 8.92   | 218.51        | 133.35 | 165.42 | 173.86                 | 198.63  | 597.36  |
| 20 | 354.89                 | 683.27  | 181.74  | 14.47          | -5     | 16.7   | 1.66           | -2.48  | 3.31   | 3.71           | 30.33  | 0      | 93.6          | 163.32 | 53.39  | 237.33                 | 320.74  | 452.13  |
| 21 | 271.05                 | 90.13   | 138.8   | -0.59          | 4.34   | 1.34   | 2.18           | -1.42  | 5.47   | 2.8            | 0      | 0      | 111.79        | 56.51  | 78.2   | 213.75                 | 69.05   | 266.55  |
| 22 | 83.22                  | 376.5   | 142.22  | -4.56          | -15.08 | -1.26  | 0              | 22.25  | 1.65   | 0              | 0      | 0      | 50.47         | 110.95 | 94.31  | 141.3                  | 217.13  | 47.12   |
| 23 | 3272.42                | 811.19  | 373.14  | -6.22          | -13.56 | 8.62   | -3.96          | 15.09  | 0      | 49.07          | 0.51   | 11.11  | 340.53        | 214.63 | 65.82  | 483.18                 | 66.18   | 168.38  |
| 24 | 328.16                 | 123.42  | 20.87   | 0.96           | -14.67 | 8.41   | 0              | 2.26   | 0      | 0              | 0      | 0      | 74.63         | 29.91  | 8.35   | 338.04                 | 293.51  | -161.33 |
| 25 | 87.98                  | 90.43   | 83.31   | -4.85          | -19.62 | -14.01 | 32.52          | -22.26 | -20.31 | 0              | 0      | 2.8    | 42.86         | 34.6   | 49.53  | -159.63                | -62.25  | -70.09  |
| 26 | 208.62                 | 201.56  | 215.53  | -7.12          | 3.13   | -13.92 | -3.03          | -0.7   | 6.13   | 0              | 0      | 2.44   | 5.41          | 7.43   | 15.28  | -94.61                 | 274.15  | 164.31  |
| 27 | 2881.07                | 538.53  | 439.54  | 0.17           | -3.44  | -14.47 | 8.98           | 0      | 9.73   | 26.92          | 7.39   | 10.1   | 316.53        | 123.73 | 106.58 | 489.02                 | 135.5   | 204.4   |
| 28 | 2879.82                | 1010.44 | 241.22  | -0.18          | 0.52   | -15.99 | 35.18          | 8.52   | 7.68   | 43.4           | 12.86  | -2.47  | 373.57        | 203.31 | 42.43  | 91.27                  | 44.16   | 19.51   |
| 29 | -10.49                 | 38.3    | 106.38  | 38.04          | -82.91 | 43.76  | 0              | -3.46  | 2.57   | 0              | 0      | 0      | 0             | 19.61  | 40.7   | 91.46                  | -27.19  | 109.01  |

**Supplementary Table 2.** The changes of IL-2/IFN- $\gamma$  and IL-10/IFN- $\gamma$  ratios in supernatant of QFT-GIT during anti-TB treatment.

|    | IL-10/IFN- $\gamma$ |         |         | IL-2/IFN- $\gamma$ |        |        |
|----|---------------------|---------|---------|--------------------|--------|--------|
|    | T0                  | T2      | Tend    | T0                 | T2     | Tend   |
| 1  | 0.0000              | -0.0020 | -0.0126 | 0.2083             | 0.2699 | 0.2814 |
| 2  | 0.0009              | -0.0594 | -0.1428 | 0.2111             | 0.7211 | 1.3586 |
| 3  | 0.0013              | -0.0381 | -0.1670 | 0.5951             | 1.9297 | 1.8412 |
| 4  | 0.0011              | -0.0006 | -0.0004 | 0.1202             | 0.2690 | 0.2679 |
| 5  | -0.0005             | -0.0081 | -0.0014 | 0.4731             | 0.5951 | 0.6473 |
| 6  | 0.0011              | -0.0835 | -0.0487 | 0.2650             | 0.9050 | 0.4964 |
| 7  | 0.0041              | -0.1001 | -0.0279 | 0.7644             | 0.8454 | 0.7634 |
| 8  | 0.0928              | 0.0412  | 0.0612  | 0.2421             | 0.3084 | 0.4509 |
| 9  | 0.0051              | 0.0344  | -0.0628 | 0.5676             | 0.9686 | 0.9622 |
| 10 | 0.0005              | 0.0037  | -0.0277 | 0.1512             | 0.2533 | 0.3127 |
| 11 | -0.0009             | -0.0103 | -0.0161 | 0.1187             | 0.2586 | 0.2600 |
| 12 | 0.0000              | 0.0002  | 0.0001  | 0.0000             | 0.4113 | 0.4091 |
| 13 | 0.0003              | -0.0009 | -0.0166 | 0.0976             | 0.2210 | 0.1062 |
| 14 | 0.0011              | -0.0005 | -0.0003 | 0.2659             | 0.3380 | 0.3580 |
| 15 | -0.0052             | -0.0436 | 0.0049  | 0.4441             | 0.7197 | 0.4234 |
| 16 | -0.0127             | -0.2532 | -0.1127 | 0.7260             | 0.7244 | 0.5323 |
| 17 | -0.0002             | -0.0004 | -0.0013 | 0.1109             | 0.1907 | 0.2061 |
| 18 | 0.0027              | 0.0048  | 0.0063  | 0.4075             | 0.5046 | 0.4112 |
| 19 | -0.0186             | -0.0766 | -0.0374 | 0.1386             | 0.3988 | 0.1420 |
| 20 | 0.0408              | -0.0073 | 0.0919  | 0.2637             | 0.2390 | 0.2938 |
| 21 | -0.0022             | 0.0482  | 0.0097  | 0.4124             | 0.6270 | 0.5634 |
| 22 | -0.0548             | -0.0401 | -0.0089 | 0.6065             | 0.2947 | 0.6631 |
| 23 | -0.0019             | -0.0167 | 0.0231  | 0.1041             | 0.2646 | 0.1764 |
| 24 | 0.0029              | -0.1189 | 0.4030  | 0.2274             | 0.2423 | 0.4001 |
| 25 | -0.0551             | -0.2170 | -0.1682 | 0.4872             | 0.3826 | 0.5945 |
| 26 | -0.0341             | 0.0155  | -0.0646 | 0.0259             | 0.0369 | 0.0709 |
| 27 | 0.0001              | -0.0064 | -0.0329 | 0.1099             | 0.2298 | 0.2425 |
| 28 | -0.0001             | 0.0005  | -0.0663 | 0.1297             | 0.2012 | 0.1759 |
| 29 | -3.6263             | -2.1648 | 0.4114  | 0.0000             | 0.5120 | 0.3826 |

**Supplementary Table 3.** The changes of serum inflammatory markers during anti-TB treatment.

|    | WBC   |       |      | monocyte |      |      | lymphocyte |      |      | platelet |     |      | RDW  |      |      | MPV  |      |      |
|----|-------|-------|------|----------|------|------|------------|------|------|----------|-----|------|------|------|------|------|------|------|
|    | T0    | T2    | Tend | T0       | T2   | Tend | T0         | T2   | Tend | T0       | T2  | Tend | T0   | T2   | Tend | T0   | T2   | Tend |
| 1  | 5.91  | 5.43  | 8.91 | 0.44     | 0.36 | 0.51 | 1.81       | 1.46 | 1.9  | 205      | 200 | 229  | 12.6 | 12.5 | 12.8 | 9.3  | 9.3  | 7.9  |
| 2  | 12.31 | 15.15 | 6.53 | 0.88     | 0.64 | 0.38 | 1.23       | 1.16 | 1.55 | 548      | 510 | 371  | 14.3 | 15.5 | 12.7 | 9.1  | 6.8  | 9.8  |
| 3  | 8.38  | 8.14  | 6.12 | 0.42     | 0.47 | 0.55 | 2.22       | 2.62 | 2.11 | 256      | 230 | 201  | 13.9 | 14.3 | 14   | 9.7  | 7.7  | 9.5  |
| 4  | 4.24  | 4.56  | 3.74 | 0.28     | 0.49 | 0.28 | 1.15       | 1.84 | 1.63 | 418      | 258 | 223  | 15.6 | 14.5 | 14.5 | 9.1  | 10.2 | 10.7 |
| 5  | 9.06  | 2.88  | 3.69 | 0.71     | 0.22 | 0.44 | 1.96       | 1.27 | 1.54 | 436      | 268 | 236  | 14.5 | 14.4 | 13.1 | 7.1  | 9    | 9.3  |
| 6  | 5.39  | 3.69  | 3.12 | 0.38     | 0.28 | 0.27 | 1.59       | 0.64 | 0.87 | 250      | 187 | 180  | 13.7 | 13.7 | 13   | 6.9  | 9.4  | 9.6  |
| 7  | 6.04  | 5.26  | 4.97 | 0.25     | 0.4  | 0.3  | 1.61       | 1.73 | 1.87 | 181      | 161 | 152  | 12.2 | 12.7 | 12.5 | 8.8  | 8.3  | 8.4  |
| 8  | 10.07 | 4.6   | 5.44 | 0.52     | 0.35 | 0.22 | 1.08       | 1.06 | 1.32 | 497      | 299 | 290  | 12.2 | 15.8 | 12.4 | 6.8  | 8.1  | 7    |
| 9  | 6.99  | 6.94  | 5.84 | 0.33     | 0.73 | 0.62 | 1.23       | 1.2  | 1.66 | 361      | 236 | 250  | 11.8 | 12.8 | 12.6 | 9.2  | 7.4  | 9.5  |
| 10 | 5.5   | 3.64  | 4.7  | 0.38     | 0.2  | 0.31 | 1.6        | 1.6  | 1.32 | 226      | 233 | 205  | 16.7 | 13.8 | 15.2 | 9.7  | 6.9  | 9.2  |
| 11 | 7.07  | 5.39  | 5.51 | 0.47     | 0.31 | 0.37 | 1.27       | 1.34 | 1.02 | 193      | 200 | 238  | 12.6 | 12.8 | 13.2 | 9.8  | 7.4  | 9.3  |
| 12 | 9.89  | 5.32  | 5.68 | 0.32     | 0.39 | 0.38 | 1.62       | 1.76 | 1.65 | 388      | 287 | 274  | 14.3 | 15.5 | 16.9 | 7.6  | 10.1 | 10.7 |
| 13 | 7.2   | 4.46  | 4.37 | 0.07     | 0.2  | 0.31 | 0.88       | 1.3  | 1.65 | 267      | 207 | 218  | 12.4 | 12.9 | 12.5 | 7.7  | 9.3  | 9.8  |
| 14 | 6.31  | 4.95  | 5.87 | 0.37     | 0.36 | 0.36 | 1.92       | 2.47 | 2.66 | 269      | 243 | 241  | 12.5 | 13.5 | 12.5 | 7    | 9    | 10.2 |
| 15 | 7.1   | 3.56  | 4.68 | 0.36     | 0.13 | 0.34 | 1.77       | 1.38 | 1.38 | 264      | 249 | 239  | 14.6 | 14.3 | 16.3 | 10.7 | 10.2 | 10.1 |
| 16 | 5.47  | 5.53  | 4.33 | 0.2      | 0.26 | 0.23 | 1.87       | 1.62 | 1.82 | 251      | 213 | 210  | 11.7 | 11.9 | 11.8 | 8    | 9.5  | 10.1 |
| 17 | 10.11 | 6.63  | 5.46 | 0.91     | 0.48 | 0.6  | 2.12       | 2.52 | 1.96 | 325      | 257 | 222  | 13.6 | 13.9 | 13.4 | 7.8  | 10.7 | 11.1 |
| 18 | 6.55  | 3.78  | 3.35 | 0.37     | 0.22 | 0.25 | 1.88       | 2.08 | 1.6  | 291      | 281 | 244  | 13.8 | 14   | 14.6 | 9.9  | 9.7  | 10.3 |
| 19 | 4.69  | 5.17  | 3.16 | 0.23     | 0.34 | 0.18 | 2.06       | 1.13 | 1.27 | 292      | 253 | 251  | 12.5 | 12   | 12   | 7.2  | 8.7  | 8.4  |
| 20 | 8.06  | 6.74  | 7.4  | 0.65     | 0.71 | 0.68 | 1.7        | 1.75 | 2.18 | 250      | 235 | 264  | 13.4 | 12.4 | 13.3 | 10.1 | 9.9  | 10   |
| 21 | 6.4   | 5.65  | 6.8  | 0.71     | 0.47 | 0.57 | 2.16       | 1.2  | 2.23 | 290      | 285 | 296  | 13.7 | 14.1 | 13.9 | 9    | 8.9  | 8.7  |
| 22 | 11.52 | 10.89 | 7.95 | 0.82     | 0.72 | 0.59 | 2.71       | 2.82 | 2.26 | 408      | 308 | 301  | 13.9 | 13   | 12   | 8.4  | 8.4  | 8.5  |
| 23 | 5.75  | 6.6   | 3.94 | 0.31     | 0.39 | 0.43 | 1.58       | 1.97 | 1.38 | 360      | 255 | 209  | 12.4 | 13.1 | 12.1 | 10   | 9.7  | 9.9  |
| 24 | 7.64  | 4.47  | 5.68 | 0.39     | 0.39 | 0.46 | 1.93       | 1.93 | 2.76 | 426      | 222 | 193  | 19.3 | 12.3 | 11.7 | 7.8  | 8.1  | 8.1  |
| 25 | 5.98  | 4.43  | 5.89 | 0.49     | 0.49 | 0.4  | 0.78       | 0.84 | 0.78 | 393      | 306 | 307  | 12.6 | 13.2 | 12.2 | 7.4  | 9.5  | 10.1 |
| 26 | 5.64  | 4.1   | 3.46 | 0.33     | 0.4  | 0.33 | 1.51       | 1.09 | 1.5  | 393      | 221 | 160  | 11.8 | 12   | 11.8 | 8.9  | 8.7  | 9    |
| 27 | 4.92  | 3.88  | 4.03 | 0.64     | 0.59 | 0.37 | 1.4        | 1.54 | 1.95 | 269      | 227 | 238  | 16.5 | 12.2 | 12.2 | 10.2 | 10.4 | 10.3 |
| 28 | 5.56  | 5.58  | 4.94 | 0.49     | 0.3  | 0.35 | 2.83       | 1.36 | 2.54 | 215      | 179 | 170  | 15.2 | 15.7 | 17.6 | 10.6 | 10   | 10   |
| 29 | 8.43  | 3.99  | 6.6  | -        | -    | -    | -          | -    | -    | 320      | 274 | 288  | -    | -    | -    | -    | -    | -    |

**Supplementary Table 4.** The changes of neutrophil to lymphocyte, platelet to lymphocyte, and monocyte to lymphocyte ratios during anti-TB treatment.

|    | MLR    |        |        | PLR      |          |          | NLR    |         |        |
|----|--------|--------|--------|----------|----------|----------|--------|---------|--------|
|    | T0     | T2     | Tend   | T0       | T2       | Tend     | T0     | T2      | T6     |
| 1  | 0.2431 | 0.2466 | 0.2684 | 113.2597 | 136.9863 | 120.5263 | 1.9006 | 2.3425  | 3.2263 |
| 2  | 0.7154 | 0.5517 | 0.2452 | 445.5284 | 439.6552 | 239.3548 | 8.2602 | 11.3276 | 2.7871 |
| 3  | 0.1892 | 0.1794 | 0.2607 | 115.3153 | 87.7863  | 95.2607  | 2.4820 | 1.7099  | 1.6161 |
| 4  | 0.2435 | 0.2663 | 0.1718 | 363.4783 | 140.2174 | 136.8098 | 2.3217 | 1.0870  | 1.0307 |
| 5  | 0.3622 | 0.1732 | 0.2857 | 222.4490 | 211.0236 | 153.2467 | 2.9898 | 1.0157  | 1.0649 |
| 6  | 0.2390 | 0.4375 | 0.3103 | 157.2327 | 292.1875 | 206.8965 | 1.7736 | 3.7813  | 1.8736 |
| 7  | 0.1553 | 0.2312 | 0.1604 | 112.4224 | 93.0636  | 80.8941  | 2.5528 | 1.7168  | 1.4529 |
| 8  | 0.4815 | 0.3302 | 0.1667 | 460.1852 | 282.0755 | 219.6970 | 7.6944 | 2.9057  | 2.7727 |
| 9  | 0.2683 | 0.6083 | 0.3735 | 293.4959 | 196.6667 | 150.6024 | 4.2846 | 4.1000  | 2.0663 |
| 10 | 0.2375 | 0.1250 | 0.2348 | 141.2500 | 145.6250 | 155.3030 | 2.0313 | 1.0188  | 2.2500 |
| 11 | 0.3701 | 0.2313 | 0.3627 | 151.9685 | 149.2537 | 233.3333 | 4.1575 | 2.6716  | 3.9902 |
| 12 | 0.1975 | 0.2216 | 0.2303 | 239.5062 | 163.0682 | 166.0606 | 4.7160 | 1.7045  | 2.0727 |
| 13 | 0.0795 | 0.1538 | 0.1879 | 303.4091 | 159.2308 | 132.1212 | 7.0000 | 2.1923  | 1.4242 |
| 14 | 0.1927 | 0.1457 | 0.1353 | 140.1042 | 98.3806  | 90.6015  | 1.9635 | 0.7854  | 1.0000 |
| 15 | 0.2034 | 0.0942 | 0.2464 | 149.1525 | 180.4348 | 173.1884 | 2.7684 | 1.3333  | 2.0652 |
| 16 | 0.1070 | 0.1605 | 0.1264 | 134.2246 | 131.4815 | 115.3846 | 1.6898 | 2.0309  | 1.1648 |
| 17 | 0.4292 | 0.1905 | 0.3061 | 153.3019 | 101.9841 | 113.2653 | 3.1415 | 1.3770  | 1.3929 |
| 18 | 0.1968 | 0.1058 | 0.1563 | 154.7872 | 135.0962 | 152.5000 | 2.2181 | 0.6346  | 0.8688 |
| 19 | 0.1117 | 0.3009 | 0.1417 | 141.7476 | 223.8938 | 197.6378 | 0.9417 | 3.0177  | 1.1969 |
| 20 | 0.3824 | 0.4057 | 0.3119 | 147.0588 | 134.2857 | 121.1009 | 2.9765 | 2.1829  | 1.9174 |
| 21 | 0.3287 | 0.3917 | 0.2556 | 134.2593 | 237.5000 | 132.7354 | 1.5417 | 3.1833  | 1.7220 |
| 22 | 0.3026 | 0.2553 | 0.2611 | 150.5535 | 109.2199 | 133.1858 | 2.8819 | 2.5496  | 2.1549 |
| 23 | 0.1962 | 0.1980 | 0.3116 | 227.8481 | 129.4416 | 151.4493 | 2.3481 | 2.0863  | 1.4348 |
| 24 | 0.2021 | 0.2021 | 0.1667 | 203.6269 | 158.5492 | 111.2319 | 1.7617 | 1.0363  | 0.9348 |
| 25 | 0.6282 | 0.5833 | 0.5128 | 503.8462 | 263.0952 | 205.1282 | 5.2821 | 3.0476  | 2.2436 |
| 26 | 0.2185 | 0.3670 | 0.2200 | 178.1457 | 208.2569 | 158.6667 | 1.8278 | 2.0183  | 1.3600 |
| 27 | 0.4571 | 0.3831 | 0.1897 | 153.5714 | 116.2338 | 87.1795  | 2.2500 | 2.0519  | 1.2718 |
| 28 | 0.1731 | 0.2206 | 0.1378 | 113.0742 | 201.4706 | 113.3858 | 1.7845 | 1.6765  | 1.4370 |
